# Supplementary material for: Enhancer Trapping and Annotation in Zebrafish Mediated with Sleeping Beauty, piggyBac and Tol2 Transposons
Source: MDPI journal article supplement (doi:10.3390/genes9120630), 2018-12-13
Supplement: s1 [file s1]

| Primers         | From 5' to 3'         |
|-----------------|-----------------------|
| qEn1F           | CACAAAAGCACCGTCCATGG  |
| qEn1R           | GGTCAGTACTCCAGCACACC  |
| qEn2F           | TCTCCTCTTGATTACGCGCC  |
| qEn2R           | TATAACTACCGCTGCGCACC  |
| qEn3F           | AGAGAGAGGGAGTGGAGCAG  |
| qEn3R           | CAAGCCTAACCAACCCGACT  |
| qEn4F           | GGGAGAAACAGCGACAGGAA  |
| qEn4R           | TGAGAAAGAGTGGCGTGGAA  |
| qEn5F           | AGGCTGAAGATTCCAAGCGG  |
| qEn5R           | GCGTCGTGTTGCTGTTGTTA  |
| qEn6F           | CATTTTGCCTTGGCGTGTAT  |
| qEn6R           | ATGAGGGCTGCTTTTCTAGG  |
| qEn7F           | TGCAAGTAGGTGATCGGCAG  |
| qEn7R           | CAACCCACACACTCTCTCCC  |
| qEn8F           | CAACTGACCCAATCGAGGCT  |
| qEn8R           | GACTGTCCCCTGTGTCACTG  |
| qEn9F           | GCGTTCATCCCACTCAGTCA  |
| qEn9R           | AGCGGGAGTTGAGTTTGGAG  |
| qEn10F          | CTTTCTCATCCGGCAAAGTGG |
| qEn10R          | CTCTCGTGGCTGTTTCGGTA  |
| EF1 F           | GATGCACCACGAGTCTCTGA  |
| EF1 R           | TGATGACCTGAGCGTTGAAG  |
| <i>dlx1a</i> F  | CCCAGACCAGATGTGATCCG  |
| <i>dlx1a</i> R  | AAGAGTCACGGAAAGGGCAG  |
| <i>dlx2a</i> F  | ACCGATGCCACGTTGATCAT  |
| <i>dlx2a</i> R  | GTGCTCTGATTCACCCTGCT  |
| <i>rps26</i> F  | AACGGTCGTGCTAAGAAGGG  |
| <i>rps26</i> R  | GTGGTGTACGGTCCTTCCTG  |
| <i>ednraa</i> F | TGACTGACTGACGGGATCCT  |
| <i>ednraa</i> R | CATCCTGGGCTTCCTCTGTG  |
| <i>wnt1</i> F   | ACCAGAAAACCCAGCGCATA  |
| <i>wnt1</i> R   | CTTTCGGTGACCTGCTCCAT  |
| <i>wnt10</i> F  | TCACGGTACTGGGCAATGAC  |
| <i>wnt10</i> R  | CCCCTGTTGAGAATGGCACT  |
