# Supplementary material for: Enhancer Trapping and Annotation in Zebrafish Mediated with Sleeping Beauty, piggyBac and Tol2 Transposons
Source: MDPI journal article supplement (doi:10.3390/genes9120630), 2018-12-13
Supplement: s1 [file s1]

| Primers | From 5' to 3'                                   |
|---------|-------------------------------------------------|
| SPLINK1 | CGAAGAGTAACCGTTGCTAGGAGAGACC                    |
| SPLINK2 | GTGGCTGAATGAGACTGGTGTGCGAC                      |
| SB-1R   | TCCAAGCTGTTTAAAGGCACAGTCA                       |
| SB-2R   | TCATGCACAAAGTAGATGTCC                           |
| PB-1R   | ACTTTATAGAAGAAATTTTGAGTTTTTGT                   |
| PB-2R   | GTTGAATTTATTATTAGTATGTAAGTGT                    |
| Tol2-1R | TCAAAGTCCCTCTGCGTGTC                            |
| Tol2-2R | GCTGGCTGACCAATTTTATACACTC                       |
| T1      | TGCTCTCACACACACACAAG                            |
| En1F    | GG <u>GAAATC</u> CGGAATAAAAGAAAAAGCAAAGC        |
| En1R    | CC <u>ACCGGT</u> TCTCTCCATCCCCTTTAG             |
| En2aF   | GG <u>GAAATC</u> CAGAGGGTCAGCGTTATTTCACTCT      |
| En2aR   | CC <u>ACCGGT</u> GCCTTCATCACTCCGACATTGT         |
| En2b3F  | GG <u>GAAATC</u> CAGGAATGAAAAATCCTGCTTTATTTTCCC |
| En2b3R  | CC <u>ACCGGT</u> TGTAGACAACCTTGAAAAATGCCATACCC  |
| En3F    | GG <u>GAAATC</u> TTTGATCGATGTGTTTATCA           |
| En3R    | CC <u>ACCGGT</u> GCTCCTTGTCCAGCTTCCC            |
| En4F    | GG <u>GAAATC</u> TGGTCTACGACCATCCAATT           |
| En4R    | CC <u>ACCGGT</u> AGAGGACTTGAGAAAGAGT            |
| En5F    | GG <u>GAAATC</u> CAGGCTGAAGATTCCAAGCGG          |
| En5R    | CC <u>ACCGGT</u> TATCCGTTTCTCTCCTACTT           |
| En6F    | GG <u>GAAATC</u> CAAGCTCTGGCAACGAAAAGT          |
| En6R    | CC <u>ACCGGT</u> TATTTAATGAGGGCTGCTT            |
| En7F    | GG <u>GAAATC</u> CAGGGAGGCAGAGGGTGGA            |
| En7R    | CC <u>ACCGGT</u> CCCTCTCCCTGCTTGCCG             |
| En8F    | GG <u>GAAATC</u> TAATTATTGGCTATGTTTTTACAGCAA    |
| En8R    | CC <u>ACCGGT</u> GTACTTATGCAAGCTGCTCTC          |
| En9F    | GG <u>ACCGGT</u> ATCTCTCTCTCTCTTTTGT            |

|       |                                               |
|-------|-----------------------------------------------|
| En9R  | CC <u>ACCGGTA</u> AATTGTGACATAATTGGGTAATACTAA |
| En10F | GG <u>GAAATTC</u> TTTCTCATCCGGCAAAGT          |
| En10R | CC <u>ACCGGTT</u> TCCTTTGCTCATAGTCAT          |

---
