# Supplementary figures and images for: Enhancer Trapping and Annotation in Zebrafish Mediated with Sleeping Beauty, piggyBac and Tol2 Transposons
Source: MDPI journal article supplement (doi:10.3390/genes9120630), 2018-12-13

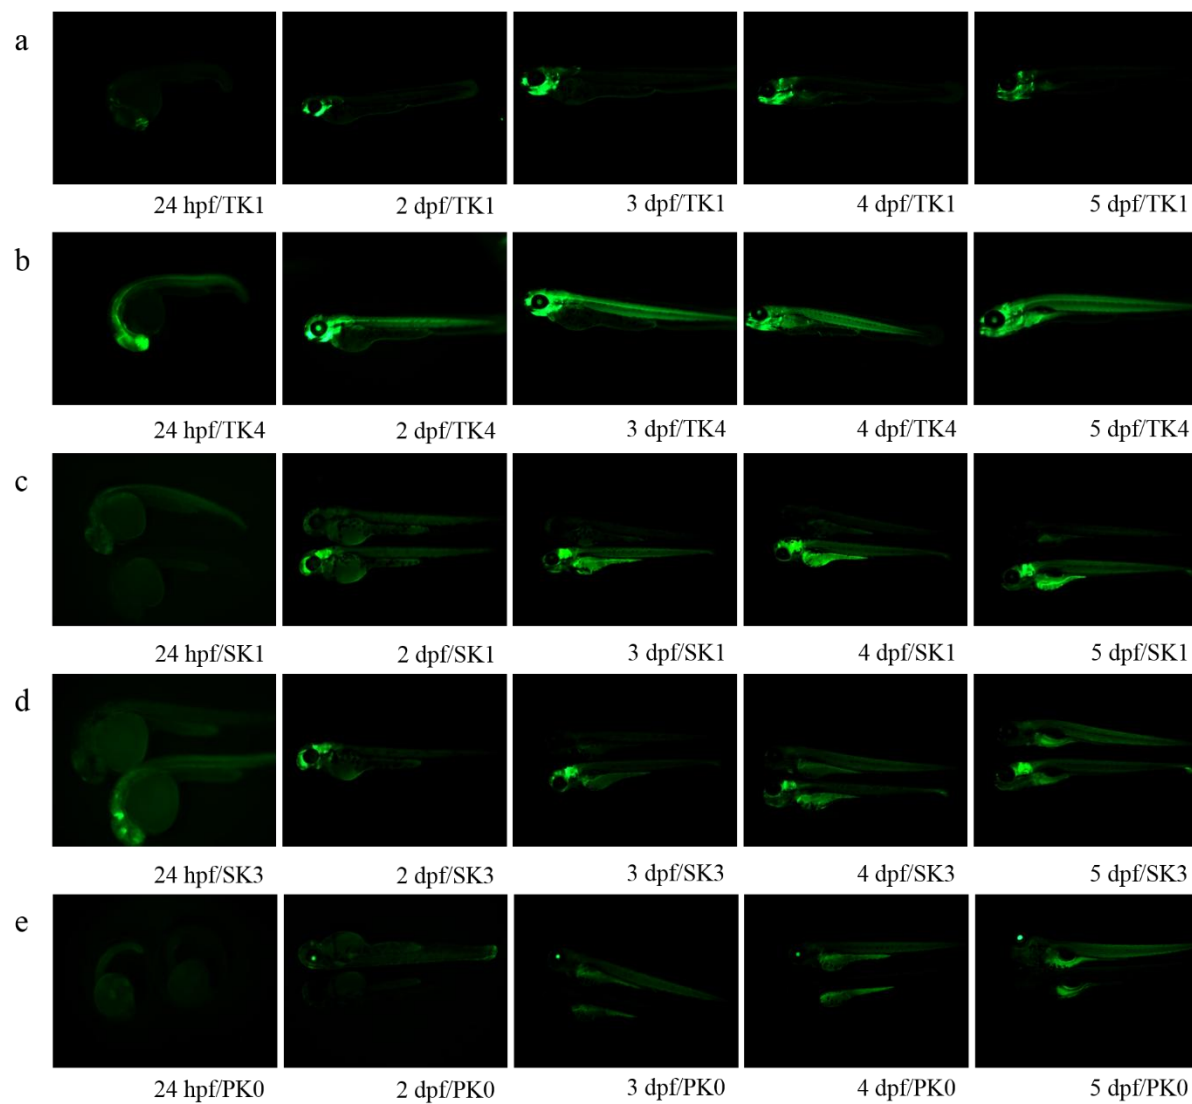

Supplement: s1 [file s1]
